# Supplementary material
Source: PubMed Central journal article supplement (PMC7758825)
Supplement: jamaophthalmol-e205720-s001.pdf [file jamaophthalmol-e205720-s001.pdf]

## Supplemental Online Content

Singh AD, Zabor EC, Radivoyevitch T. Estimating cured fractions of uveal melanoma. *JAMA Ophthalmol*. Published online December 23, 2020.  
doi:10.1001/jamaophthalmol.2020.5720

**eFigure.** Mortality in the US has not changed much in 40 years

**eTable 1.** Full results underlying Figure 1A

**eTable 2.** Full results underlying Figure 1B

**eTable 3.** Full results underlying Figure 3A

**eTable 4.** Full results underlying Figure

This supplemental material has been provided by the authors to give readers additional information about their work.

This supplement provides eFigure 1 showing no major changes in mortality in the US over the last 40 years and eTables of full mortality since diagnosis (msd) outputs of the SEERaBomb R function msd, including for each time interval (int) the number of person-years at risk (PY), observed deaths (O), expected deaths (E), and PY-weighted interval time midpoints (t). Also shown are EAR and RR formed as  $(O-E)/PY$  and  $O/E$ , respectively; 95% confidence interval limits are LL (lower limit) and UL (upper limit) for EAR and rrL and rrU for RR.

**eFigure 1.** Mortality in the US has not changed much in 40 years.

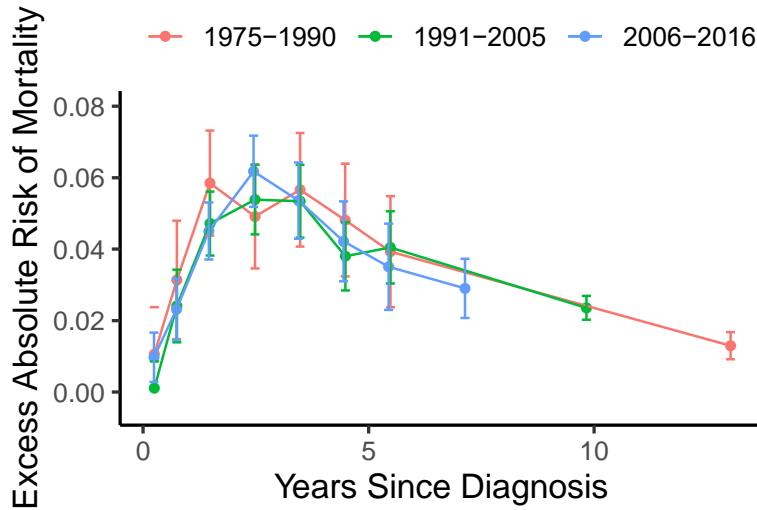

**eTable 1.** Full results underlying Figure 1A.

| Group     | int      | O   | E    | PY    | t     | EAR      | LL       | UL      | RR    | rrL   | rrU  |
|-----------|----------|-----|------|-------|-------|----------|----------|---------|-------|-------|------|
| 1 Pooled  | (0,0.5]  | 160 | 125. | 5215. | 0.244 | 0.00676  | 0.00200  | 0.0115  | 1.28  | 1.09  | 1.50 |
| 2 Pooled  | (0.5,1]  | 238 | 115. | 4947. | 0.743 | 0.0248   | 0.0187   | 0.0309  | 2.06  | 1.81  | 2.34 |
| 3 Pooled  | (1,2]    | 655 | 220. | 9057. | 1.47  | 0.0481   | 0.0425   | 0.0536  | 2.98  | 2.76  | 3.22 |
| 4 Pooled  | (2,3]    | 641 | 196. | 7888. | 2.47  | 0.0564   | 0.0501   | 0.0626  | 3.26  | 3.02  | 3.53 |
| 5 Pooled  | (3,4]    | 547 | 176. | 6852. | 3.47  | 0.0541   | 0.0474   | 0.0608  | 3.10  | 2.85  | 3.37 |
| 6 Pooled  | (4,5]    | 407 | 159. | 5987. | 4.47  | 0.0414   | 0.0348   | 0.0480  | 2.56  | 2.32  | 2.82 |
| 7 Pooled  | (5,6]    | 348 | 145. | 5261. | 5.47  | 0.0386   | 0.0316   | 0.0455  | 2.40  | 2.15  | 2.67 |
| 8 Pooled  | (6,8]    | 534 | 256. | 8773. | 6.89  | 0.0317   | 0.0266   | 0.0369  | 2.09  | 1.92  | 2.27 |
| 9 Pooled  | (8,10]   | 365 | 213. | 6888. | 8.89  | 0.0221   | 0.0167   | 0.0276  | 1.72  | 1.54  | 1.90 |
| 10 Pooled | (10,12]  | 290 | 177. | 5306. | 10.9  | 0.0213   | 0.0150   | 0.0276  | 1.64  | 1.45  | 1.84 |
| 11 Pooled | (12,15]  | 301 | 197. | 5601. | 13.2  | 0.0185   | 0.0125   | 0.0246  | 1.53  | 1.36  | 1.71 |
| 12 Pooled | (15,20]  | 289 | 210. | 5294. | 16.8  | 0.0149   | 0.00858  | 0.0212  | 1.37  | 1.22  | 1.54 |
| 13 Pooled | (20,25]  | 141 | 128. | 2710. | 21.8  | 0.00485  | -0.00373 | 0.0134  | 1.10  | 0.928 | 1.30 |
| 14 Pooled | (25,30]  | 74  | 76.4 | 1450. | 26.9  | -0.00165 | -0.0133  | 0.00998 | 0.969 | 0.761 | 1.22 |
| 15 Pooled | (30,35]  | 43  | 44.4 | 763.  | 31.8  | -0.00189 | -0.0187  | 0.0150  | 0.968 | 0.700 | 1.30 |
| 16 Pooled | (35,100] | 20  | 21.1 | 266.  | 36.5  | -0.00416 | -0.0371  | 0.0287  | 0.948 | 0.579 | 1.46 |

**eTable 2.** Full results underlying Figure 1B.

| Group           | int      | O   | E    | PY    | t     | EAR      | LL       | UL      | RR    | rrL   | rrU  |
|-----------------|----------|-----|------|-------|-------|----------|----------|---------|-------|-------|------|
| 1 Old (>60)     | (0,0.5]  | 138 | 113. | 2857. | 0.244 | 0.00892  | 0.000857 | 0.0170  | 1.23  | 1.03  | 1.45 |
| 2 Old (>60)     | (0.5,1]  | 197 | 104. | 2682. | 0.742 | 0.0348   | 0.0246   | 0.0451  | 1.90  | 1.65  | 2.19 |
| 3 Old (>60)     | (1,2]    | 486 | 196. | 4802. | 1.46  | 0.0604   | 0.0514   | 0.0694  | 2.48  | 2.26  | 2.71 |
| 4 Old (>60)     | (2,3]    | 454 | 174. | 4049. | 2.46  | 0.0692   | 0.0589   | 0.0795  | 2.61  | 2.38  | 2.86 |
| 5 Old (>60)     | (3,4]    | 361 | 155. | 3416. | 3.46  | 0.0604   | 0.0495   | 0.0713  | 2.33  | 2.10  | 2.59 |
| 6 Old (>60)     | (4,5]    | 302 | 138. | 2883. | 4.46  | 0.0568   | 0.0450   | 0.0686  | 2.18  | 1.94  | 2.44 |
| 7 Old (>60)     | (5,6]    | 220 | 125. | 2446. | 5.46  | 0.0389   | 0.0270   | 0.0508  | 1.76  | 1.54  | 2.01 |
| 8 Old (>60)     | (6,8]    | 367 | 217. | 3913. | 6.86  | 0.0383   | 0.0287   | 0.0479  | 1.69  | 1.52  | 1.87 |
| 9 Old (>60)     | (8,10]   | 233 | 176. | 2840. | 8.85  | 0.0201   | 0.00960  | 0.0307  | 1.33  | 1.16  | 1.51 |
| 10 Old (>60)    | (10,12]  | 202 | 143. | 2035. | 10.8  | 0.0290   | 0.0153   | 0.0426  | 1.41  | 1.22  | 1.62 |
| 11 Old (>60)    | (12,15]  | 204 | 151. | 1896. | 13.1  | 0.0278   | 0.0130   | 0.0426  | 1.35  | 1.17  | 1.55 |
| 12 Old (>60)    | (15,20]  | 172 | 149. | 1508. | 16.6  | 0.0150   | -0.00208 | 0.0320  | 1.15  | 0.985 | 1.34 |
| 13 Old (>60)    | (20,25]  | 85  | 76.8 | 552.  | 21.5  | 0.0148   | -0.0180  | 0.0475  | 1.11  | 0.884 | 1.37 |
| 14 Old (>60)    | (25,100] | 45  | 45.8 | 210.  | 26.9  | -0.00399 | -0.0665  | 0.0585  | 0.982 | 0.716 | 1.31 |
| 15 Young (<=60) | (0,0.5]  | 22  | 12.2 | 2357. | 0.245 | 0.00414  | 0.000239 | 0.00804 | 1.80  | 1.13  | 2.72 |
| 16 Young (<=60) | (0.5,1]  | 41  | 11.8 | 2264. | 0.745 | 0.0129   | 0.00737  | 0.0185  | 3.48  | 2.50  | 4.73 |
| 17 Young (<=60) | (1,2]    | 169 | 23.6 | 4254. | 1.48  | 0.0342   | 0.0282   | 0.0402  | 7.17  | 6.13  | 8.34 |
| 18 Young (<=60) | (2,3]    | 187 | 22.6 | 3839. | 2.48  | 0.0428   | 0.0358   | 0.0498  | 8.26  | 7.12  | 9.53 |
| 19 Young (<=60) | (3,4]    | 186 | 21.6 | 3437. | 3.47  | 0.0478   | 0.0401   | 0.0556  | 8.61  | 7.42  | 9.94 |
| 20 Young (<=60) | (4,5]    | 105 | 20.7 | 3104. | 4.48  | 0.0271   | 0.0207   | 0.0336  | 5.06  | 4.14  | 6.13 |
| 21 Young (<=60) | (5,6]    | 128 | 20.1 | 2815. | 5.48  | 0.0383   | 0.0305   | 0.0462  | 6.37  | 5.31  | 7.57 |
| 22 Young (<=60) | (6,8]    | 167 | 38.5 | 4860. | 6.91  | 0.0264   | 0.0212   | 0.0316  | 4.33  | 3.70  | 5.04 |
| 23 Young (<=60) | (8,10]   | 132 | 36.9 | 4048. | 8.92  | 0.0235   | 0.0179   | 0.0291  | 3.58  | 3.00  | 4.25 |
| 24 Young (<=60) | (10,12]  | 88  | 34.0 | 3271. | 10.9  | 0.0165   | 0.0109   | 0.0221  | 2.58  | 2.07  | 3.18 |
| 25 Young (<=60) | (12,15]  | 97  | 45.9 | 3705. | 13.3  | 0.0138   | 0.00858  | 0.0190  | 2.11  | 1.71  | 2.58 |
| 26 Young (<=60) | (15,20]  | 117 | 60.8 | 3786. | 16.9  | 0.0148   | 0.00924  | 0.0204  | 1.92  | 1.59  | 2.31 |
| 27 Young (<=60) | (20,25]  | 56  | 51.0 | 2158. | 21.9  | 0.00232  | -0.00448 | 0.00911 | 1.10  | 0.829 | 1.43 |
| 28 Young (<=60) | (25,100] | 92  | 96.1 | 2269. | 28.5  | -0.00181 | -0.0101  | 0.00648 | 0.957 | 0.772 | 1.17 |

**eTable 3.** Full results underlying Figure 3A. SEER rows are as in eTable 1. GB = Good-Bad

| GB      | int      | O   | E    | PY    | t     | EAR       | LL       | UL      | RR    | rrL    | rrU  |
|---------|----------|-----|------|-------|-------|-----------|----------|---------|-------|--------|------|
| 1 SEER  | (0,0.5]  | 160 | 125. | 5215. | 0.244 | 0.00676   | 0.00200  | 0.0115  | 1.28  | 1.09   | 1.50 |
| 2 SEER  | (0.5,1]  | 238 | 115. | 4947. | 0.743 | 0.0248    | 0.0187   | 0.0309  | 2.06  | 1.81   | 2.34 |
| 3 SEER  | (1,2]    | 655 | 220. | 9057. | 1.47  | 0.0481    | 0.0425   | 0.0536  | 2.98  | 2.76   | 3.22 |
| 4 SEER  | (2,3]    | 641 | 196. | 7888. | 2.47  | 0.0564    | 0.0501   | 0.0626  | 3.26  | 3.02   | 3.53 |
| 5 SEER  | (3,4]    | 547 | 176. | 6852. | 3.47  | 0.0541    | 0.0474   | 0.0608  | 3.10  | 2.85   | 3.37 |
| 6 SEER  | (4,5]    | 407 | 159. | 5987. | 4.47  | 0.0414    | 0.0348   | 0.0480  | 2.56  | 2.32   | 2.82 |
| 7 SEER  | (5,6]    | 348 | 145. | 5261. | 5.47  | 0.0386    | 0.0316   | 0.0455  | 2.40  | 2.15   | 2.67 |
| 8 SEER  | (6,8]    | 534 | 256. | 8773. | 6.89  | 0.0317    | 0.0266   | 0.0369  | 2.09  | 1.92   | 2.27 |
| 9 SEER  | (8,10]   | 365 | 213. | 6888. | 8.89  | 0.0221    | 0.0167   | 0.0276  | 1.72  | 1.54   | 1.90 |
| 10 SEER | (10,12]  | 290 | 177. | 5306. | 10.9  | 0.0213    | 0.0150   | 0.0276  | 1.64  | 1.45   | 1.84 |
| 11 SEER | (12,15]  | 301 | 197. | 5601. | 13.2  | 0.0185    | 0.0125   | 0.0246  | 1.53  | 1.36   | 1.71 |
| 12 SEER | (15,20]  | 289 | 210. | 5294. | 16.8  | 0.0149    | 0.00858  | 0.0212  | 1.37  | 1.22   | 1.54 |
| 13 SEER | (20,25]  | 141 | 128. | 2710. | 21.8  | 0.00485   | -0.00373 | 0.0134  | 1.10  | 0.928  | 1.30 |
| 14 SEER | (25,30]  | 74  | 76.4 | 1450. | 26.9  | -0.00165  | -0.0133  | 0.00998 | 0.969 | 0.761  | 1.22 |
| 15 SEER | (30,35]  | 43  | 44.4 | 763.  | 31.8  | -0.00189  | -0.0187  | 0.0150  | 0.968 | 0.700  | 1.30 |
| 16 SEER | (35,100] | 20  | 21.1 | 266.  | 36.5  | -0.00416  | -0.0371  | 0.0287  | 0.948 | 0.579  | 1.46 |
| 17 All  | (0,1]    | 24  | 11.5 | 534.  | 0.477 | 0.0234    | 0.00539  | 0.0414  | 2.08  | 1.33   | 3.10 |
| 18 All  | (1,2]    | 47  | 9.75 | 429.  | 1.45  | 0.0868    | 0.0555   | 0.118   | 4.82  | 3.54   | 6.41 |
| 19 All  | (2,3]    | 57  | 7.85 | 345.  | 2.44  | 0.143     | 0.0997   | 0.186   | 7.27  | 5.50   | 9.41 |
| 20 All  | (3,5]    | 52  | 11.0 | 440.  | 3.79  | 0.0931    | 0.0610   | 0.125   | 4.74  | 3.54   | 6.21 |
| 21 All  | (5,9]    | 26  | 8.79 | 274.  | 5.95  | 0.0628    | 0.0263   | 0.0993  | 2.96  | 1.93   | 4.33 |
| 22 All  | (9,30]   | 10  | 4.54 | 132.  | 10.9  | 0.0412    | -0.00556 | 0.0880  | 2.20  | 1.06   | 4.05 |
| 23 Good | (0,1]    | 3   | 3.58 | 211.  | 0.484 | -0.00272  | -0.0188  | 0.0133  | 0.839 | 0.173  | 2.45 |
| 24 Good | (1,2]    | 2   | 3.09 | 166.  | 1.46  | -0.00655  | -0.0232  | 0.0101  | 0.647 | 0.0784 | 2.34 |
| 25 Good | (2,3]    | 3   | 3.08 | 152.  | 2.46  | -0.000531 | -0.0228  | 0.0218  | 0.974 | 0.201  | 2.85 |
| 26 Good | (3,5]    | 6   | 4.99 | 224.  | 3.85  | 0.00451   | -0.0169  | 0.0259  | 1.20  | 0.441  | 2.62 |
| 27 Good | (5,9]    | 6   | 3.95 | 156.  | 5.97  | 0.0132    | -0.0176  | 0.0440  | 1.52  | 0.558  | 3.31 |
| 28 Good | (9,30]   | 3   | 2.05 | 72.4  | 11.0  | 0.0131    | -0.0338  | 0.0600  | 1.46  | 0.301  | 4.27 |
| 29 Bad  | (0,1]    | 21  | 7.95 | 322.  | 0.470 | 0.0405    | 0.0126   | 0.0684  | 2.64  | 1.64   | 4.04 |
| 30 Bad  | (1,2]    | 45  | 6.66 | 263.  | 1.45  | 0.146     | 0.0959   | 0.196   | 6.76  | 4.93   | 9.04 |
| 31 Bad  | (2,3]    | 54  | 4.76 | 192.  | 2.41  | 0.256     | 0.181    | 0.331   | 11.3  | 8.51   | 14.8 |
| 32 Bad  | (3,5]    | 46  | 5.99 | 217.  | 3.73  | 0.185     | 0.123    | 0.246   | 7.68  | 5.62   | 10.2 |
| 33 Bad  | (5,9]    | 20  | 4.84 | 118.  | 5.93  | 0.128     | 0.0540   | 0.202   | 4.13  | 2.52   | 6.38 |
| 34 Bad  | (9,30]   | 7   | 2.48 | 60.1  | 10.8  | 0.0751    | -0.0112  | 0.161   | 2.82  | 1.13   | 5.80 |

**eTable 4.** Full results underlying Figure 3B (and Figures 4A and 4B).

| mut      | int    | O  | E     | PY   | t     | EAR      | LL       | UL     | RR    | rrL    | rrU  |
|----------|--------|----|-------|------|-------|----------|----------|--------|-------|--------|------|
| 1 BAP1   | (0,1]  | 14 | 5.10  | 190. | 0.471 | 0.0468   | 0.00825  | 0.0853 | 2.75  | 1.50   | 4.61 |
| 2 BAP1   | (1,2]  | 34 | 4.32  | 159. | 1.45  | 0.187    | 0.115    | 0.259  | 7.88  | 5.45   | 11.0 |
| 3 BAP1   | (2,3]  | 38 | 3.05  | 113. | 2.41  | 0.308    | 0.202    | 0.415  | 12.5  | 8.83   | 17.1 |
| 4 BAP1   | (3,5]  | 32 | 3.70  | 126. | 3.74  | 0.224    | 0.136    | 0.312  | 8.65  | 5.91   | 12.2 |
| 5 BAP1   | (5,9]  | 14 | 3.44  | 94.5 | 6.18  | 0.112    | 0.0342   | 0.189  | 4.07  | 2.23   | 6.84 |
| 6 BAP1   | (9,30] | 7  | 2.48  | 60.1 | 10.8  | 0.0751   | -0.0112  | 0.161  | 2.82  | 1.13   | 5.80 |
| 7 SF3B1  | (0,1]  | 1  | 0.830 | 58.2 | 0.485 | 0.00292  | -0.0307  | 0.0366 | 1.20  | 0.0305 | 6.71 |
| 8 SF3B1  | (1,2]  | 4  | 0.774 | 54.5 | 1.48  | 0.0592   | -0.0127  | 0.131  | 5.17  | 1.41   | 13.2 |
| 9 SF3B1  | (2,3]  | 5  | 0.681 | 46.7 | 2.48  | 0.0924   | -0.00136 | 0.186  | 7.34  | 2.38   | 17.1 |
| 10 SF3B1 | (3,5]  | 4  | 1.03  | 60.9 | 3.86  | 0.0488   | -0.0156  | 0.113  | 3.89  | 1.06   | 9.97 |
| 11 SF3B1 | (5,9]  | 6  | 0.980 | 64.4 | 6.29  | 0.0780   | 0.00340  | 0.153  | 6.12  | 2.25   | 13.3 |
| 12 SF3B1 | (9,30] | 6  | 0.431 | 27.0 | 10.8  | 0.206    | 0.0284   | 0.384  | 13.9  | 5.10   | 30.3 |
| 13 WT    | (0,1]  | 1  | 2.04  | 90.3 | 0.496 | -0.0115  | -0.0332  | 0.0102 | 0.490 | 0.0124 | 2.73 |
| 14 WT    | (1,2]  | 3  | 2.04  | 85.5 | 1.48  | 0.0112   | -0.0285  | 0.0509 | 1.47  | 0.303  | 4.30 |
| 15 WT    | (2,3]  | 4  | 2.06  | 79.9 | 2.49  | 0.0243   | -0.0248  | 0.0733 | 1.94  | 0.529  | 4.97 |
| 16 WT    | (3,5]  | 3  | 3.29  | 122. | 3.91  | -0.00240 | -0.0303  | 0.0255 | 0.911 | 0.188  | 2.66 |
| 17 WT    | (5,9]  | 7  | 2.94  | 106. | 6.21  | 0.0383   | -0.0106  | 0.0872 | 2.38  | 0.956  | 4.90 |

18 WT (9,30] 3 2.05 72.4 11.0 0.0131 -0.0338 0.0600 1.46 0.301 4.27
